# Supplementary material for: Polysulfates Block SARS‐CoV‐2 Uptake through Electrostatic Interactions
Source: PubMed Central journal article supplement — Angew Chem Int Ed Engl. 2021 Jun 9;60(29):15870–8. doi: 10.1002/anie.202102717 (PMC8250366; doi:10.1002/anie.202102717), 2021-06-09
Supplement: ANIE-60-15870-s001.pdf [file ANIE-60-15870-s001.pdf]

## Supporting Information

### **Polysulfates Block SARS-CoV-2 Uptake through Electrostatic Interactions\*\***

*Chuanxiong Nie,\* Paria Pouyan, Daniel Lauster, Jakob Trimpert, Yannic Kerkhoff, Gergo Peter Szekeres,\* Matthias Wallert, Stephan Block, Anil Kumar Sahoo,\* Jens Dervedde, Kevin Pagel, Benedikt B. Kaufer, Roland R. Netz, Matthias Ballauff, and Rainer Haag\**

anie\_202102717\_sm\_miscellaneous\_information.pdf

## Supporting Information

### Experimental Procedures

**Materials.** Anhydrous solvents (dimethylformamide and toluene), benzoylated cellulose dialysis tubes (2000 Da, 32 mm width) and heparin (sodium salt from porcine intestinal mucosa, H3393-500KU) were purchased from Merck (Darmstadt, Germany). Pentosan sulfate is obtained from Bene Arzneimittel GmbH, Munich, Germany. All other chemicals were bought from Merck (Darmstadt, Germany) unless stated otherwise.

**Methods.** Elemental composition determination was performed on a Vario EL CHNS element analyzer by Elementar Analysensysteme GmbH (Langselbold, Germany).  $^1\text{H}$  NMR spectra were recorded on a Bruker AMX 500 (Bruker Corporation) or Jeol ECP 500 (JEOL GmbH). Chemical shifts ( $\delta$ ) are reported in ppm via the deuterated solvent peak as the standard. GPC measurements in water were performed with an Agilent 1100 equipped with an automatic injector, isopump, and Agilent 1100 differential refractometer (Agilent Technologies, Santa Clara, CA, USA). The PSS Suprema (pre-column, 1x with pore size of 30 Å, 2x with pore size of 1000 Å (all of them with a particle size of 10  $\mu\text{m}$ ) column, was calibrated against Pullulan standards prior to measurements. The GPC measurements in THF were done with an Agilent Security (1200 Serie), equipped with automatic injector, isopump, and UV and RI detector. The separation was done via a PL gel from Agilent (1x pre-column, 3x Mixed-C with a particle size of 5  $\mu\text{m}$ ), which was calibrated against polystyrene standards. The GPC measurements in water were performed on an Agilent 1100 from Agilent technologies equipped with isopump. The column was calibrated with pullulan standards prior to measurements.

**Synthesis of linear polyglycerol (LPG).** Linear polyglycerol (LPG) was firstly synthesized by anionic ring opening polymerization of ethoxyethyl glycidyl ether,<sup>[1-3]</sup> followed by deprotection in slightly acidic media.

**Synthesis of ethoxyethyl glycidyl ether (EEGE).** The acetal protection of glycidol was done slightly modified to a reported protocol.<sup>[4]</sup> In summary, in an ice bath glycidol (70 mL, 1.052 mol, 1 eq.) of glycidol was mixed under stirring with divinyl ether (403.3 mL, 4.21 mol, 4 eq.) and *p*-TsOH.H<sub>2</sub>O (2 g, 0.0105 mol, 0.01 eq.) was slowly added to the mixture. After 4 hours the reaction was quenched and washed with saturated NaHCO<sub>3</sub> solution. The organic phase was dried over sodium sulfate and concentrated under reduced pressure. The crude product was dried over CaH<sub>2</sub> and distilled under vacuum over preheated molecular sieve and stored under argon in freezer until further use. Due to storage under dry and inert conditions, weighing of the final product was not possible and complete conversion of starting material is assumed.

$^1\text{H}$  NMR (500 MHz, ACETONE-*D*<sub>6</sub>)  $\delta$  4.70 (qd,  $J$  = 5.3, 2.4 Hz, 1H), 3.77 (dd,  $J$  = 11.5, 3.0 Hz, 1H), 3.73 – 3.57 (m, 1H), 3.50 – 3.41 (m, 1H), 3.30 (dd,  $J$  = 11.5, 6.4 Hz, 1H), 3.12 – 3.00 (m, 1H), 2.69 (ddd,  $J$  = 5.3, 4.1, 2.1 Hz, 1H), 2.52 (ddd,  $J$  = 11.9, 5.2, 2.6 Hz, 1H), 1.22 (t,  $J$  = 5.3 Hz, 3H), 1.12 (td,  $J$  = 7.1, 1.1 Hz, 3H).

**Polymerization of ethoxyethyl glycidyl ether (PEEGE) and deprotection to LPG.** The polymerization was done based on a reported protocol.<sup>[4]</sup> In summary for 20 kDa LPG: In a flame-dried Schlenck flask Oct<sub>4</sub>NBr (172.78 mg, 0.310 mmol, 0.0047 eq.) was dried under high vacuum and dissolved in 60 mL dry toluene. Afterwards EEGE (10 mL, 65.6 mmol, 1 eq.) was added under inert conditions. Then in an ice bath *i*-Bu<sub>3</sub>Al (1.4 mL, 1.55 mmol, 0.023 eq.) was added all at once. The reaction was let to proceed overnight, thereafter quenched by addition of 1 mL of EtOH. The excess of activator was precipitated in cold Et<sub>2</sub>O. The product was dialyzed in acetone (MWCO: 2 kDa) for further purification. After drying, the product was obtained as 8.38 g colorless viscous oil (50%).  $^1\text{H}$  NMR (500 MHz, ACETONE-*D*<sub>6</sub>)  $\delta$  4.81 – 4.60 (m, 1H), 3.83 – 3.32 (m, 7H, monomer unit), 1.33 – 1.22 (m, 3H), 1.14 (t, 3H). The acetal groups were

## SUPPORTING INFORMATION

then deprotected in a solution of 3% HCl (37%) in EtOH. The mixture was stirred overnight and then purified by dialysis against water (MWCO:2 kDa).

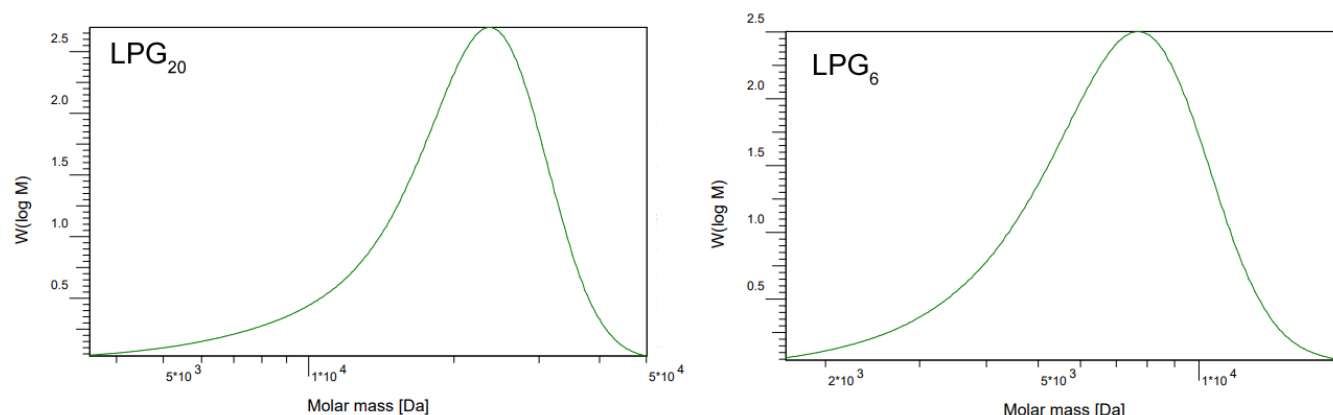

Figure S1. GPC water elugrams for LPG<sub>20</sub> and LPG<sub>7</sub> before sulfation, respectively, which show the monomodal distribution.

**Synthesis of hyperbranched polyglycerols.** Hyperbranched polyglycerol (hPG) was synthesized by ring-opening multibranching polymerization of glycidol in a heterogenous reaction mixture in dioxane. This method only allowed the molecular weight of hPG to be increased to only 800-900 kDa. To obtain the high-molecular weight hPG, a two-step polymerization is used as reported in our previous studies. More details and characterizations can be found in Ref [3].

First, a macroinitiator was synthesized in a heterogenous reaction mixture in dioxane. Dry trimethylolpropane (120 mg, 0.89 mmol, 1.0 eq.) was partially deprotonated (30% OH) with potassium methoxide (67  $\mu$ L, 0.27 mmol, 0.3 eq., 25% in methanol) in argon atmosphere at 60 °C for 30 min. After the addition of 24 mL dioxane (dry) the turbid mixture was heated to 100 °C. Glycidol (12 mL, 0.18 mol, 201 eq.) was slowly added (0.5 ml h<sup>-1</sup>) via syringe pump into the reaction mixture. The polymer was purified by removing the dioxane, precipitation as methanolic solution in acetone and dialysis against water in regenerated cellulose membrane (10 kDa MWCO). The resulted hPG was obtained with a yield of 93.6%.

In the second step, this hPG was used as macroinitiator to grow the polymer further. 2.5 g (0.034 mol, total OH groups) of the lyophilized polymer was dissolved in dry DMF (35 mL). The polymer was partially deprotonated with the addition of potassium hydride in oil (30 wt.%) (80  $\mu$ g, 272  $\mu$ L, 2.0  $\mu$ mol). The temperature was increased to 100 °C and glycidol (25 mL, 0.37 mol) were added with a rate of 0.9 mL h<sup>-1</sup>. After precipitation in acetone and dialysis against water in regenerated cellulose membrane (50 kDa MWCO) the resulted molecular weight was 2.6 mDa with a PDI of 1.4.[3]

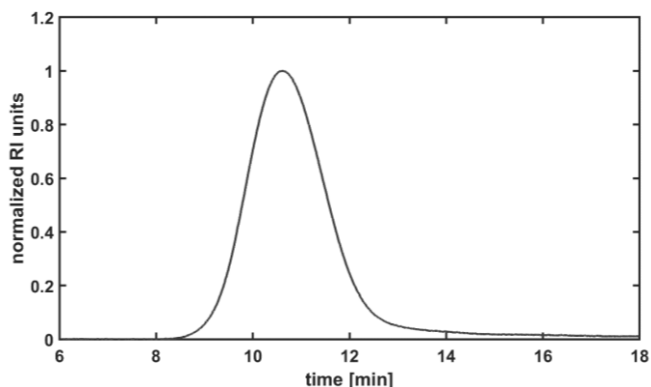

Figure S2. GPC measurement of HPG<sub>2600</sub>. For more details regarding the characterization, please see Ref [3].

**Table S1.** Summary of molecular weights for the synthesized polyglycerols. More details for the characterizations can be found in Ref [5] and Ref [3].

|                   | Mn (kDa) | Mw (kDa) | PDI |
|-------------------|----------|----------|-----|
| LPG <sub>20</sub> | 17.7     | 21.4     | 1.2 |

## SUPPORTING INFORMATION

|                     |      |      |     |
|---------------------|------|------|-----|
| LPG <sub>7</sub>    | 6.1  | 7.2  | 1.2 |
| HPG <sub>10</sub>   | 9.1  | 11.2 | 1.3 |
| HPG <sub>500</sub>  | 509  | 549  | 1.1 |
| HPG <sub>2600</sub> | 2554 | 3608 | 1.4 |

**Sulfation of the polyglycerols.** All the polymers were sulfated according to an already published protocol with slight adjustments[6] The completely dry corresponding polymer was dissolved in dry DMF (10 mL for 1 g). The mixture was then heated up to 60 °C and respective amount of SO<sub>3</sub>/pyridine (1.5 eq. of -OH groups) was added. The mixture was let stir overnight under inert atmosphere. Thereafter the pH was brought to 13 by addition of 1M NaOH to the solution. Then the polymer was dialyzed against saturated solution of NaCl for 2 days and 2 days in water. After drying in high vacuum, the crude product was obtained as white solid powder. The degree of functionalization was determined via elemental analysis.

**Plaque reduction assay.** SARS-CoV-2 München (SARS-CoV2M; BetaCoV/Germany/BavPat1/2020) was propagated on Vero E6 cells and titrated via plaque assay.[7] For a plaque reduction assay, Vero E6 cells were grown in a 12-well plate. The virions (approx. 100PFU) were firstly incubated with the compound at different concentrations for 1 hour, prior to the incubation with Vero E6 cells for 1 hour. The cells were washed with PBS once and then cultured in Avicel overlay medium for 2 days. After being fixed by the addition of 4% formaldehyde, the cells were stained with 0.75% crystal violet (aqueous solution) to count plaques. The experiment was performed in BSL3 laboratory at the Institut für Virologie, Freie Universität Berlin. The plaque reduction ratio was calculated by comparing treated samples with the non-treated virus controls as follows:

$$\text{Plaque reduction (\%)} = \left(1 - \frac{\text{Plaque number (sample)}}{\text{Plaque number (virus control)}}\right) \times 100\%$$

The IC<sub>50</sub> value was estimated by '[inhibitor] vs. response' model in GraphPad Prism 7.0.

**Virus binding to Vero E6 cells.** The virions were inactivated by 4% formaldehyde for 24 hours in BSL3 under appropriate biosafety conditions. The formaldehyde inactivated SARS-CoV-2 virions were purified and concentrated by ultracentrifugation (100,000 rpm, 2h) with 20% sucrose solution. The pellet was resuspended in PBS and stored at -80 °C before usage.

To study virus attachment, the virions were firstly labelled with 3,3'-Diiododecyl-oxacarbocyanin-perchlorate (DiO, ThermoFisher Scientific, USA). For the labelling, 100 µL virus solution was incubated with 5 µL 20 µM DiO (ethanol) for 45 min. Then, the free dye was removed by spinning column (Protein A HP SpinTrap™, GE Healthcare, Germany). For the inhibitor binding, 10 µL labelled virions was incubated with 90 µL inhibitor solution (1000 µg/mL) for 45 min at 37 °C. The mixture was incubated with Vero E6 cells for 1 h on ice. The unbound virus was removed by washing with PBS. The cell nucleus was stained with DAPI, and then the cells were visualized by confocal laser scanning microscopy (SP8, Leica, Germany).

**Image analysis for virus binding.** Quantification of bound virus particles per cell was performed by a self-written ImageJ macro. The nuclei were segmented from the background using a machine learning classifier of the Trainable Weka Segmentation plugin of ImageJ. The output probability maps of the nuclei were blurred with a Gaussian filter (radius = 5) and the touching nuclei were segmented by thresholding the background and finding local maxima (Process > Find Maxima... > Output type: Segmented Particles). The automatically detected nuclei were then manually checked and recounted and corrected if necessary. Images showing the virus particles were scaled up by a factor of 3 using bicubic interpolation to decrease pixel noise. Quantification was also performed by thresholding the background and finding local maxima which correspond to the virus particles. Virus particles per cell were determined for 4 images per sample which were then used to calculate mean and standard deviation. Paired t-tests were used to find statistically significant differences between samples.

**Virucidal assay.** The virucidal assay was performed as described in one of our recent studies.[8] Briefly speaking, 100 µL of virus solution (approx. 10<sup>5</sup> PFU/mL) was first incubated with the 100 µL LPGS or heparin at a concentration 10-fold higher than its IC<sub>50</sub> for 1

## SUPPORTING INFORMATION

h. The mixture was diluted 10-fold to an endpoint of no active virions. The number of active virions in each dilution was determined by plaque assay. The titer of active virions was then calculated for the respective dilutions.

**Post-infection assay.** Vero E6 cells were grown in a 24-well plate to 80% confluency before the infection. For the infection, the cells were incubated with SARS-CoV-2 virions (approx. 2000PFU in 100  $\mu$ L medium) for 1 hour at r.t. Afterwards, the cells were washed with PBS and cultured in the medium containing LPGS or heparin for 24 hours. Finally, the cells were fixed by 4% formaldehyde, permeabilized by 0.25% Triton X-100 and labelled by SARS-CoV-2 nucleocapsid (N) Protein Antibody (Rockland, USA) and goat anti-mouse IgG (Alexa 488 conjugated, Thermofisher, Germany). The cell nuclei were stained by DAPI and then images were taken on a ZEISS AxioScope 5 fluorescence microscope (ZEISS, Germany). The total cells are counted via the 'Particle analysis' function of ImageJ, while the infected cells are counted manually. The infection is then estimated by the ratio of infected cells in total cells.

**Mass spectrometry experiments.** 1 mg/mL RBD (Thermofisher, Germany), 14.6 mg/mL LPGS, and 7.6 mg/mL heparin solutions were purified by filtering through an Amicon® Ultra 3 kDa molecular weight cut-off filter (Merck, Germany) twice, which also facilitated the buffer exchange into 250 mM pH 7 ammonium acetate solution. After their purification, the LPGS and heparin solutions were diluted five-fold, and 0.4  $\mu$ L, 0.8  $\mu$ L, and 1.2  $\mu$ L of them were mixed respectively with 4.0  $\mu$ L RBD solution. The samples were loaded into Pd/Pt-coated nano-ESI capillaries produced in-house and introduced in positive ion mode at a capillary voltage of 1000 V into a Synapt G2 S instrument modified with a linear drift tube ion mobility cell. The spectra were recorded in TOF-only mode to provide softer conditions for the formed complexes in the gas phase. At least two data sets were acquired for each sample, and spectra were collected with 1 s acquisition time for 5-20 min depending on the signal intensity.

Due to the natural heterogeneity of the LPGS and heparin samples, background-correction was necessary for both the RBD-LPGS and the RBD-heparin data sets. For background correction, the spectra of the pure LPGS and heparin were acquired, mean-smoothed, and normalized for an m/z position where the pure RBD spectrum exhibits low signal intensity, while the pure LPGS or heparin spectrum exhibit high signal intensities; then, the as-normalized LPGS or heparin spectrum was subtracted from the corresponding mean-smoothed RBD-LPGS or RBD-heparin spectra.

**Microscale thermophoresis.** Experiments were conducted with a Monolith NT.115 (NanoTemper) from the laboratory of Prof. Heberle (FU Berlin). For the measurements His-tagged RBD of the SARS-CoV-2 S-protein from recombinant expression in mammalian cells was kindly provided by Dr. Coskun (TU Dresden). For the experiments, twofold dilution series of human ACE2 (novoprotein, kindly provided by Prof. Bader at MDC Berlin), LPGS, HPGS and heparin were mixed with a final concentration of 50 nM NHS-Red (NanoTemper) labeled RBD. Protein labeling and purification was performed with a 2<sup>nd</sup> generation NHS-Red labeling kit. The labeling efficiency was analyzed from spectroscopic measurements (Nanodrop) to be approximately 1:1 (protein:dye). The measurements were performed in DPBS and premium capillaries (NanoTemper) at 25°C, and default settings for the measurement runs (Initial fluorescence=5s, thermophoresis=30s, and recovery=5s). Obtained data were analyzed with a gating strategy 1.5 s after the start of the infrared laser, and data were fitted as previously shown.[9]

**MD simulations.** The coordinates for the wild type RBD of the SARS-CoV-2 spike protein were obtained from the deposited crystal structure (PDB ID: 6M0J). Two different RBD mutants (E484K or N501Y mutations) were built using PyMOL. The structure of the heparin pentamer was built using CHARMM-GUI *Glycan Reader & Modeler*. [10] The structure of LPGS undecamer was built using Avogadro software.[11] CHARMM36m[12] and CHARMM Carbohydrates[13-14] force field parameters were used to model the protein and Heparin, respectively. Parameters and partial atomic charges for LPGS were obtained using the CGenFF program[15-16] and CHARMM General force field.[17-18] CHARMM-compatible TIP3P water[19-20] and ion parameters[21] were used. RBD/LPGS and RBD/Heparin were arranged and solvated in boxes of sizes  $7\times 7\times 9.5$  nm<sup>3</sup> and  $7\times 7\times 10$  nm<sup>3</sup>, as shown in Figure 5a,b (manuscript), respectively. Enough Na<sup>+</sup> ions were added to charge neutralize each system, then Na<sup>+</sup> / Cl<sup>-</sup> ion pairs were added to obtain a 150 mM NaCl solution estimated from the mole fraction of ion pairs and water.

The simulation for each case was performed at least for 500 ns in the *NpT* ensemble at  $T = 300$  K and  $p = 1$  bar with *periodic boundary condition* in *xyz* directions, using GROMACS 2020.1 package.[22] The stochastic velocity rescaling thermostat[23] with a time constant of  $\tau_T = 0.1$  ps was used to control the temperature, while for the pressure control an isotropic Parrinello-Rahman barostat[24] was used

## SUPPORTING INFORMATION

with a time constant of  $\tau_p = 2$  ps and a compressibility of  $\kappa = 4.5 \times 10^{-5} \text{ bar}^{-1}$ . The LINCS algorithm[25] was used to constrain the bonds involving H-atoms, allowing a timestep of  $\Delta t = 2$  fs. Electrostatics interactions were computed using the particle mesh Ewald (PME) method[26] with a real-space cutoff distance of 1.2 nm, while van der Waals (VDW) interactions were modeled using Lennard-Jones potentials with a cutoff distance of 1.2 nm where the resulting forces smoothly switch to zero between of 1 nm to 1.2 nm.

**Simulation data analysis.** The electrostatic potential map of the protein was calculated using the APBS tool[27] and visualized using VMD.[28] Simulation snapshots were rendered using VMD as well.

**Number of close contacts:** A contact is defined by an atom of LPGS/Heparin falling within 3 Å of any atom of the protein residue. The total number of contacts averaged over the last 100 ns of simulation data is presented in the main text.

**Persistence length:** The persistence length  $P$  of a polymer can be estimated from the polymer's Kuhn length  $b$ , using the well-known relationship for the *worm like chain* model:  $P = b/2$ . The Kuhn length,  $b$ , is related to the contour length  $L_0$  and the end-to-end distance  $R$  of a polymer via the expression:  $b = \langle R^2 \rangle / L_0$ , where  $\langle \cdot \rangle$  represents the time average. So, the persistence length was calculated using  $P = \langle R^2 \rangle / 2L_0$ , where  $\langle R^2 \rangle$  and  $L_0$  were obtained from 200 ns of simulation data where the polymer is not attached to the protein.  $L_0$ ,  $R$ , and  $P$  for both LPGS and Heparin are given in the inset of Figure 5d in the main text.

**Cell viability.** The cells, including A549 cells, Vero E6 cells and human bronchial epithelial cell (HBE), were seeded in a 96-well plate at a density of  $1 \times 10^4$  cells/well in DMEM medium. After 24 hours, the compounds were added to each well at a final concentration of 0.1 µg/mL to 1 mg/mL. The cells were cultured for another 24 hours with compounds dispersed in the medium. Finally, the viabilities of the cells were investigated with a CCK-8 assay according to the manuals, for which the result was revealed by optical absorbance at 450 nm. Cell without any compounds was set as positive control, while 1% SDS solution was set as the negative control. The biocompatibility of the compounds was studied by comparing with the positive and negative controls as shown follows:

$$\text{Cell viability (\%)} = \left( \frac{\text{ABS450 (compounds)} - \text{ABS450 (negative control)}}{\text{ABS450 (positive control)}} \right) \times 100\%$$

**Activated partial thromboplastin time (aPTT).** The anticoagulating activity for the samples was revealed by activated partial thromboplastin time of the plasma treated with the samples.[29] Briefly, 100 µL plasma (Siemens Healthcare, Erlangen, Germany) and 100 µL Actin FS (Siemens Healthcare, Erlangen, Germany) were mixed and incubated (3 min, 37 °C) with 4 µL samples in different concentrations. H<sub>2</sub>O was set as the control. The reaction was started by the addition of 100 µL of prewarmed (37 °C) clotting activator CaCl<sub>2</sub>.

## Results and Discussion

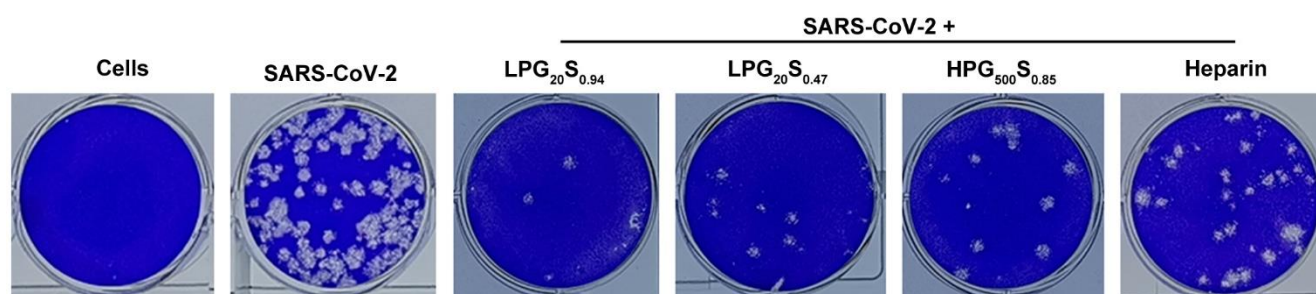

**Figure S3.** Plaque images for SARS-CoV-2 treated with different compounds at 50 µg/mL.



## SUPPORTING INFORMATION

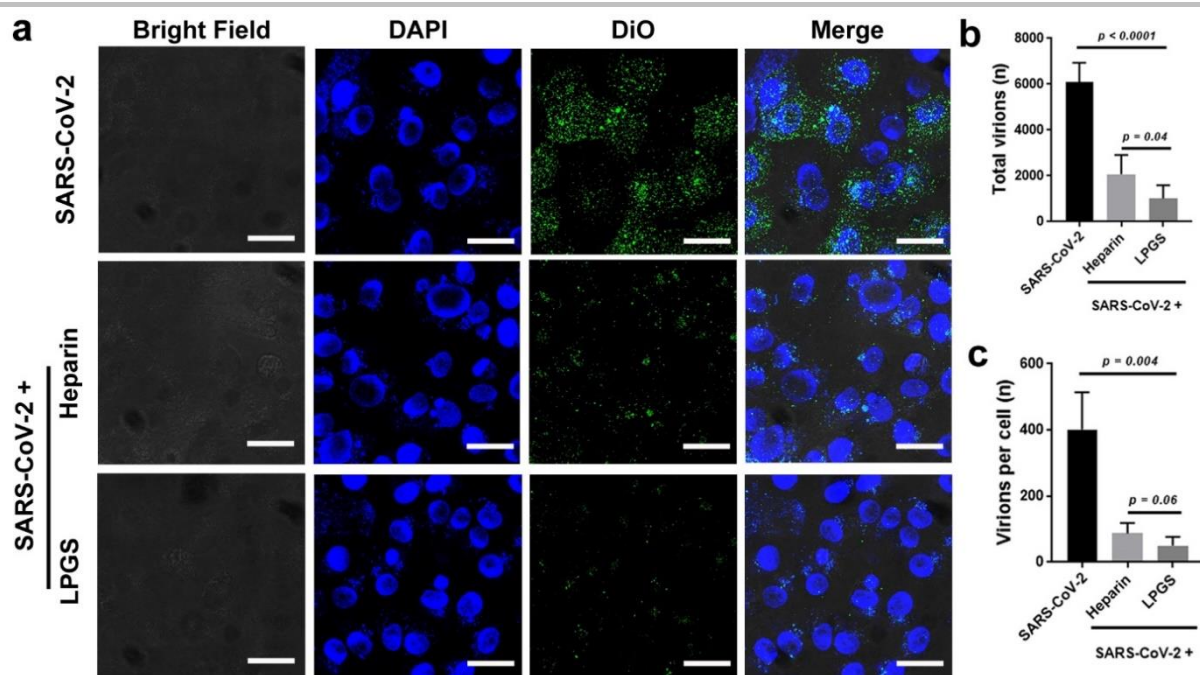

**Figure S4.** (a) CLSM image for the virus binding to Vero E6 cells in presence of the compounds. Scale bar: 10  $\mu$ m. (b, c) Analysis of virus binding to Vero E6 cells from CLSM images for the number of virions. Values are expressed as mean  $\pm$ SD,  $n=4$ . The addition of concentrated heparin (1 mg/mL) can also reduce the binding of SARS-CoV-2, probably because of steric shielding of virions by heparin at high dose.

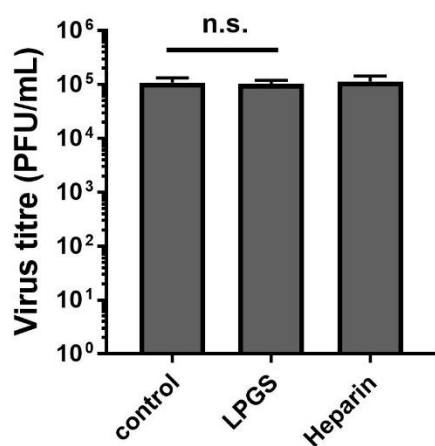

**Figure S5.** Virucidal assay of SARS-CoV-2 for LPGS and heparin. Values are expressed as mean  $\pm$ SD,  $n=4$ .

## SUPPORTING INFORMATION

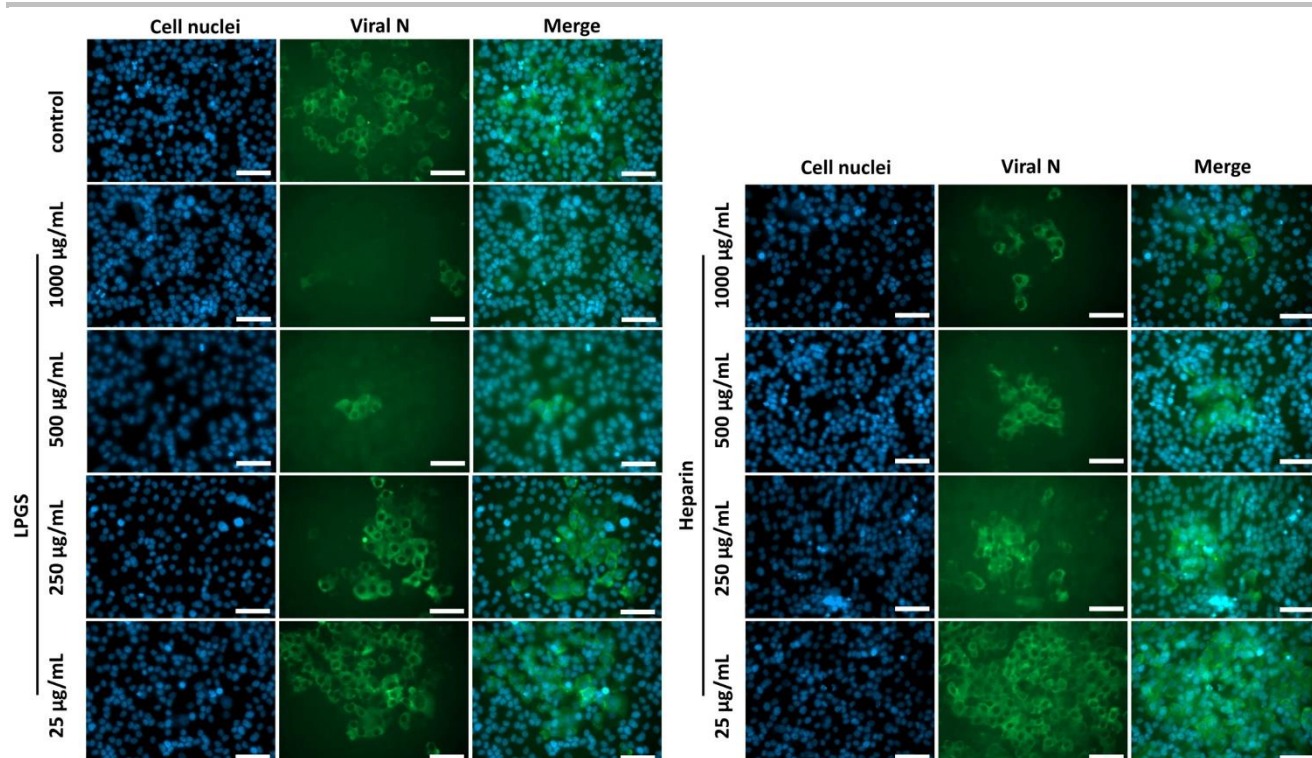

**Figure S6.** Immuno-fluorescent images revealing the infected cells in the post-infection inhibition assay. The cell nuclei are stained blue, while the infected cells are stained green by antibodies against the nucleocapsid protein (N) of SARS-CoV-2. Scale bar: 50  $\mu\text{m}$ .

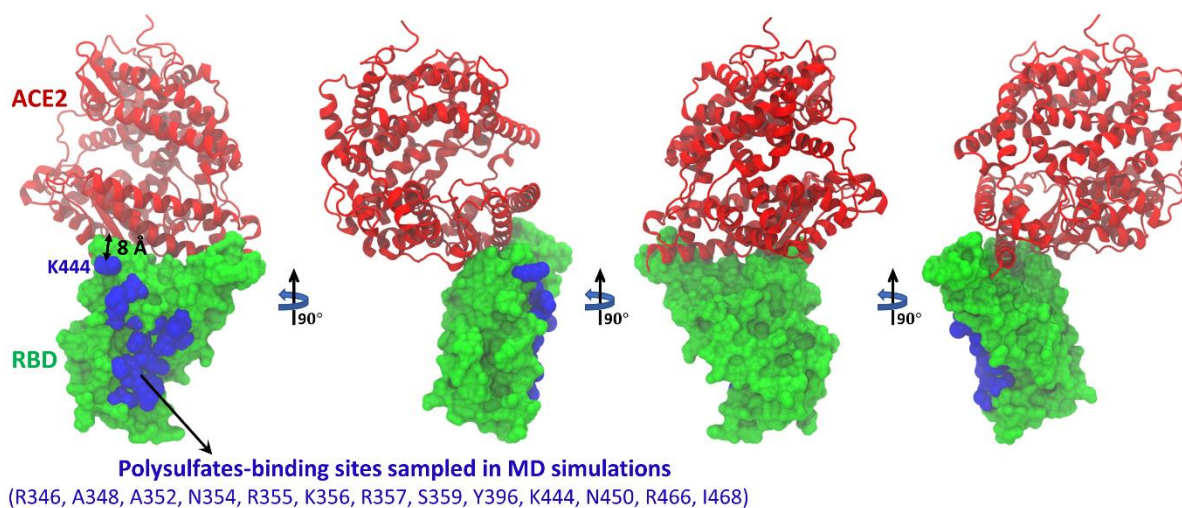

**Figure S7.** Distribution of HS binding site on the RBD of SARS-CoV-2. ACE2 is shown in secondary structure representation (red), whereas RBD is shown in surface representation (green). The amino acid residues of RBD (R346, A348, A352, N354, R355, K356, R357, S359, Y396, K444, N450, R466, I468) found to form contacts with the polysulfates in MD simulations are highlighted in VDW representation (blue), denoting the putative HS-binding site.



## SUPPORTING INFORMATION

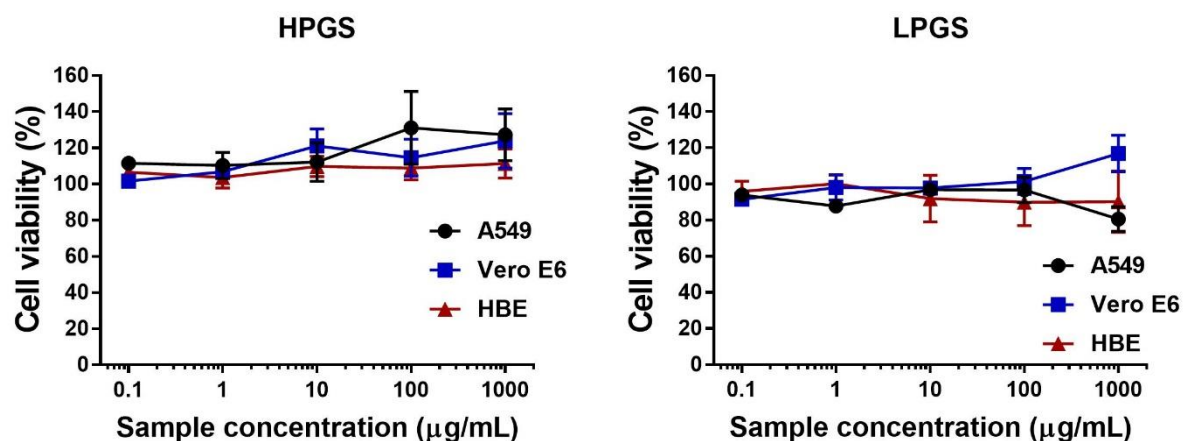

**Figure S8.** Evaluation of cellular toxicity of polyglycerol sulfates, against A549, Vero E6 and HBE cells, respectively. Values are expressed as mean  $\pm$ SD,  $n=3$ . Herein, HP GS represents HPG<sub>10</sub>S<sub>0.91</sub>.

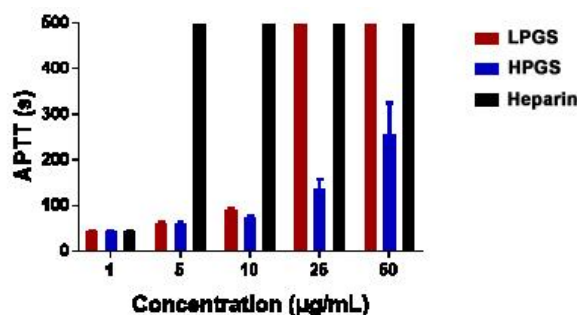

**Figure S9.** Activated partial thromboplastin time (aPTT) of plasma treated with polysulfates at different concentrations. Values are expressed as mean  $\pm$ SD,  $n=3$ . Herein, HP GS represents HPG<sub>10</sub>S<sub>0.91</sub>.

## Author Contributions

C. N. and P. P. synthesized the compounds. C. N., J. T. and B. K. performed the virus experiments and analyzed the data. C. N. performed CLSM study with virions, Y. K. and S. B. analyzed the images. D. L. performed the MST measurement. G. P. S. and K. P. performed mass spectrometry. A. K. S. and R. N. performed the MD simulations. C. N., D. L., G. P. S. and A. K. S. wrote the manuscript. J. D., M. B. and R. H. supervised the project and edited the manuscript.

## References

- [1] M. Weinhart, I. Grunwald, M. Wyszogrodzka, L. Gaetjen, A. Hartwig, R. Haag, *Chem. Asian J.* **2010**, *5*, 1992-2000.
- [2] M. Weinhart, D. Gröger, S. Enders, S. B. Riese, J. Dervedde, R. K. Kainthan, D. E. Brooks, R. Haag, *Macromol. Biosci.* **2011**, *11*, 1088-1098.
- [3] M. Wallert, C. Nie, P. Anilkumar, S. Abbina, S. Bhatia, K. Ludwig, J. N. Kizhakkedathu, R. Haag, S. Block, *Small* **2020**, *16*, 2004635.
- [4] M. Gervais, A.-L. Brocas, G. Cendejas, A. Deffieux, S. Carlotti, *Macromolecules* **2010**, *43*, 1778-1784.
- [5] P. Pouyan, C. Nie, S. Bhatia, S. Wedepohl, K. Achazi, N. Osterrieder, R. Haag, *Biomacromolecules* **2021**, 10.1021/acs.biomac.1020c01789.
- [6] H. Türk, R. Haag, S. Alban, *Bioconjug. Chem.* **2004**, *15*, 162-167.
- [7] R. Wölfel, V. M. Corman, W. Guggemos, M. Seilmaier, S. Zange, M. A. Müller, D. Niemeyer, T. C. Jones, P. Vollmar, C. Rothe, M. Hoelscher, T. Bleicker, S. Brünink, J. Schneider, R. Ehmann, K. Zwirgmaier, C. Drosten, C. Wendtner, *Nature* **2020**, *581*, 465-469.
- [8] I. S. Donskyi, C. Nie, K. Ludwig, J. Trimpert, R. Ahmed, E. Quaas, K. Achazi, J. Radnik, M. Adeli, R. Haag, K. Osterrieder, *Small*, **17**, 2007091.
- [9] S. Bhatia, D. Lauster, M. Bardua, K. Ludwig, S. Angioletti-Uberti, N. Popp, U. Hoffmann, F. Paulus, M. Budt, M. Stadtmüller, T. Wolff, A. Hamann, C. Böttcher, A. Herrmann, R. Haag, *Biomaterials* **2017**, *138*, 22-34.
- [10] S.-J. Park, J. Lee, Y. Qi, N. R. Kern, H. S. Lee, S. Jo, I. Joung, K. Joo, J. Lee, W. Im, *Glycobiology* **2019**, *29*, 320-331.
- [11] M. D. Hanwell, D. E. Curtis, D. C. Lonie, T. Vandermeersch, E. Zurek, G. R. Hutchison, *J. Cheminformatics* **2012**, *4*, 17.
- [12] J. Huang, S. Rauscher, G. Nawrocki, T. Ran, M. Feig, B. L. de Groot, H. Grubmüller, A. D. MacKerell, *Nat. Methods* **2017**, *14*, 71-73.
- [13] O. Guvench, S. S. Mallajosyula, E. P. Raman, E. Hatcher, K. Vanommeslaeghe, T. J. Foster, F. W. Jamison, A. D. MacKerell, *J. Chem. Theory Comput.* **2011**, *7*, 3162-3180.
- [14] S. S. Mallajosyula, O. Guvench, E. Hatcher, A. D. MacKerell, *J. Chem. Theory Comput.* **2012**, *8*, 759-776.
- [15] K. Vanommeslaeghe, A. D. MacKerell, *J. Chem. Inf. Model.* **2012**, *52*, 3144-3154.
- [16] K. Vanommeslaeghe, E. P. Raman, A. D. MacKerell, *J. Chem. Inf. Model.* **2012**, *52*, 3155-3168.

## SUPPORTING INFORMATION

- 
- [17] K. Vanommeslaeghe, E. Hatcher, C. Acharya, S. Kundu, S. Zhong, J. Shim, E. Darian, O. Guvench, P. Lopes, I. Vorobyov, A. D. Mackerell Jr., *J. Comput. Chem.* **2010**, *31*, 671-690.
- [18] W. Yu, X. He, K. Vanommeslaeghe, A. D. Mackerell Jr., *J. Comput. Chem.* **2012**, *33*, 2451-2468.
- [19] W. L. Jorgensen, J. Chandrasekhar, J. D. Madura, R. W. Impey, M. L. Klein, *J. Chem. Phys.* **1983**, *79*, 926-935.
- [20] A. D. Mackerell Jr, D. Bashford, M. Bellott, R. L. Dunbrack Jr, J. D. Evanseck, M. J. Field, S. Fischer, J. Gao, H. Guo, S. Ha, *J. Phys. Chem. B* **1998**, *102*, 3586-3616.
- [21] R. M. Venable, Y. Luo, K. Gawrisch, B. Roux, R. W. Pastor, *J. Phys. Chem. B* **2013**, *117*, 10183-10192.
- [22] M. J. Abraham, T. Murtola, R. Schulz, S. Páll, J. C. Smith, B. Hess, E. Lindahl, *SoftwareX* **2015**, *1-2*, 19-25.
- [23] G. Bussi, D. Donadio, M. Parrinello, *J. Chem. Phys.* **2007**, *126*, 014101.
- [24] M. Parrinello, A. Rahman, *J. Appl. Phys.* **1981**, *52*, 7182-7190.
- [25] B. Hess, *J. Chem. Theory Comput.* **2008**, *4*, 116-122.
- [26] T. Darden, D. York, L. Pedersen, *J. Chem. Phys.* **1993**, *98*, 10089-10092.
- [27] N. A. Baker, D. Sept, S. Joseph, M. J. Holst, J. A. McCammon, *Proc. Natl. Acad. Sci.* **2001**, *98*, 10037-10041.
- [28] W. Humphrey, A. Dalke, K. Schulten, *J. Mol. Graph. Model.* **1996**, *14*, 33-38.
- [29] S. Reimann, D. Gröger, C. Kühne, S. B. Riese, J. Dernedde, R. Haag, *Adv. Healthc. Mater.* **2015**, *4*, 2154-2162.
